# Supplementary material for: Degradable polymers with adjustable thermoresponsiveness based on multicomponent polymerization and molecular recognition
Source: Royal Society of Chemistry journal article supplement (doi:10.1039/d4py00309h), 2024-01-01
Supplement: d4py00309h1.pdf [file d4py00309h1.pdf]

## Supporting Information

# Degradable polymers with adjustable thermoresponsiveness based on multicomponent polymerization and molecular recognition

Yue Zhang\*, Shasha Liu, Changlan Xu

**Materials.** Poly(ethylene glycol) (PEG,  $M_n$  = 600, 1000, 1500, 2000, and 4000 Da, J&K Scientific), N, N'-dicyclohexyl carbodiimide (DCC, Guo Yao Chemical Company, 98%), 4-(dimethylamino)-pyridine (DMAP, Alfa Aesar, 99%), 4-formylbenzoic acid (Heowns, 99%), 3, 3'-dithiodipropionic acid (Aladdin, 99%),  $\beta$ -cyclodextrin sulfobutyl ethers sodium salts (SBE-CD, Aladdin, 98%), mono-(6-amino-6-deoxy)- $\beta$ -cyclodextrin (CD-NH<sub>2</sub>, Zhiyuan Biotechnology Co., Ltd.,  $\geq 99\%$ ), (2-hydroxy-3-N, N, N-trimethylamino) propyl- $\beta$ -cyclodextrin chloride (HTMAP-CD, Zhiyuan Biotechnology Co., Ltd., 99%), sodium sulfate anhydrous (AR), sodium carbonate anhydrous (AR), sodium chloride (AR), sodium thiocyanate (Macklin, 99%), and sodium iodide (Shanghai Shaoyuan Co.Ltd., 99%) were used as received. All solvents were distilled for purification before use.

**Characterization:** <sup>1</sup>H NMR and <sup>13</sup>C NMR measurements were carried out on a 400 MHz Varian UNITY-plus NMR spectrometer. And the 2D <sup>1</sup>H NOESY NMR measurements were performed on a 400 MHz Bruker Advance III NMR spectrometer. The  $M_n$  and the dispersity were measured by a Hitachi size exclusion chromatography (SEC) with DMF as the mobile phase and PMMA as the standards. The SEC was equipped with a Hitachi L-2490 refractive index detector and a Viscotek 270 dual detector. Matrix assisted laser desorption/ionization time-of-flight mass analysis (MALDI-TOF MS) were carried out on AutoflexIII LRF200-CID. The matrix used for the measurements of the polymer and the proteins are  $\alpha$ -cyano-4-hydroxycinnamic acid and the 3, 5-dimethoxy-4-hydroxycinnamic acid. The scattering light intensity, hydrodynamic diameter ( $D_h$ ), and polydispersity index (PDI) of the assemblies were measured by a Malvern Zetasizer Nano-ZS. Transmission electron microscopy (TEM) measurements were carried out on a Tecnai G2 F20 electron microscope with 200 kV operating voltage. The TEM specimens were prepared by

dropping the sample solution on a Formvar and carbon coated Cu grid. A solution of P(PEG1500)-1 with a concentration of 0.5 mg/mL was dropped onto a Cu grid at 40 °C. Excess solution was absorbed with filter paper and held at 40 °C for 0.5 h to dry the sample. The dried sample was first stained in a hydrazine hydrate atmosphere for 3 h, then dried in vacuum drying for 0.5 h. Finally, the dried sample was stained in OsO<sub>4</sub> for 0.5 h. For P(PEG600)-1, the sample was prepared at a temperature of 25 °C, and the rest of the steps were the same as above. Scanning electron microscopy (SEM) was measured with an FEI Apreo S LoVac electron microscope.

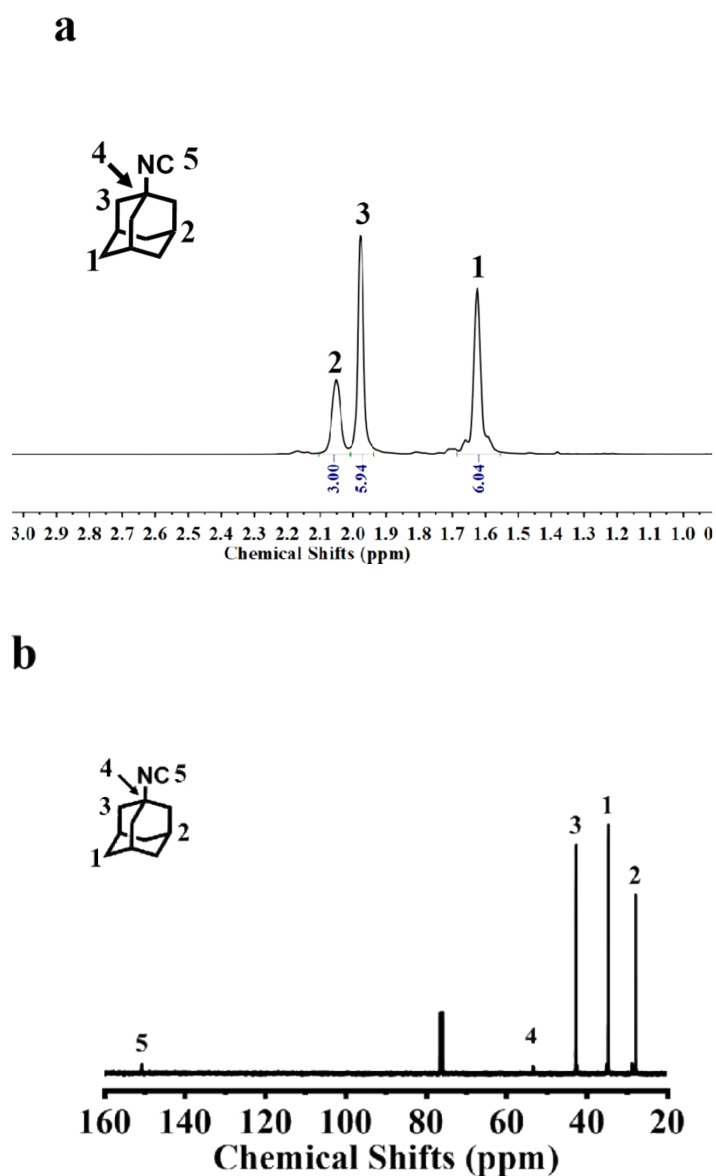

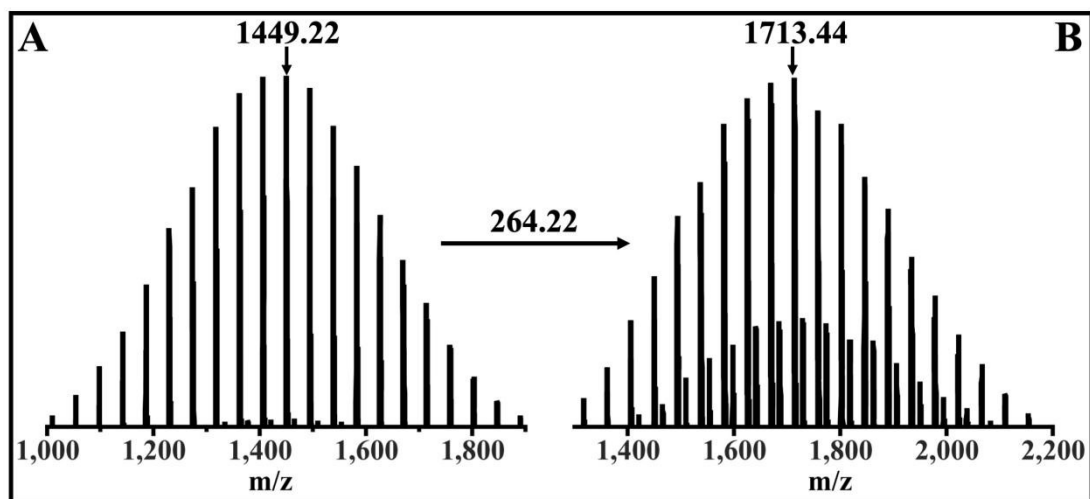

Figure S2. MALDI-TOF MS results of PEG1500 (a) and CHO-PEG1500-CHO (b).

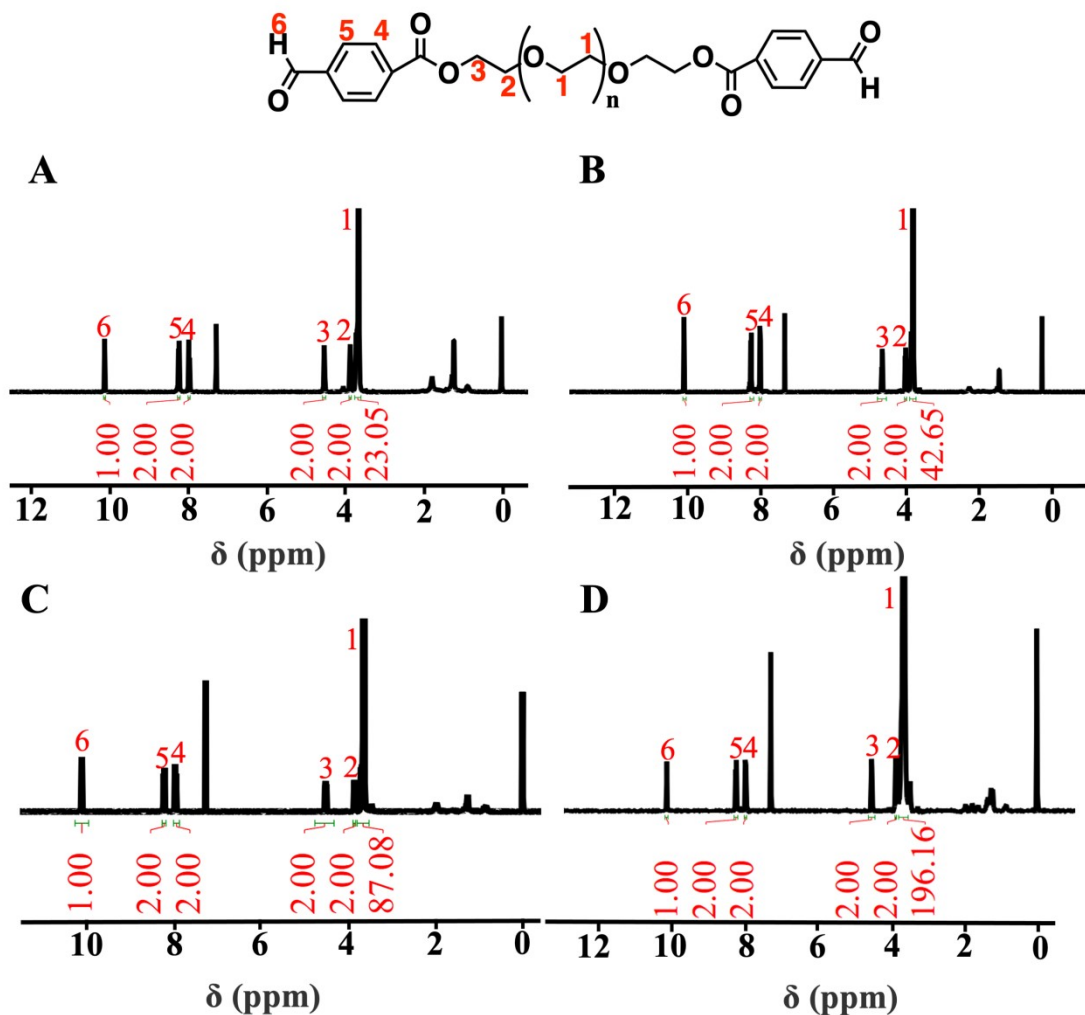

Figure S3.  $^1\text{H}$  NMR spectra of CHO-PEG600-CHO (a), CHO-PEG1000-CHO (b), CHO-PEG2000-CHO (c), and CHO-PEG4000-CHO (d) in  $\text{CDCl}_3$ .

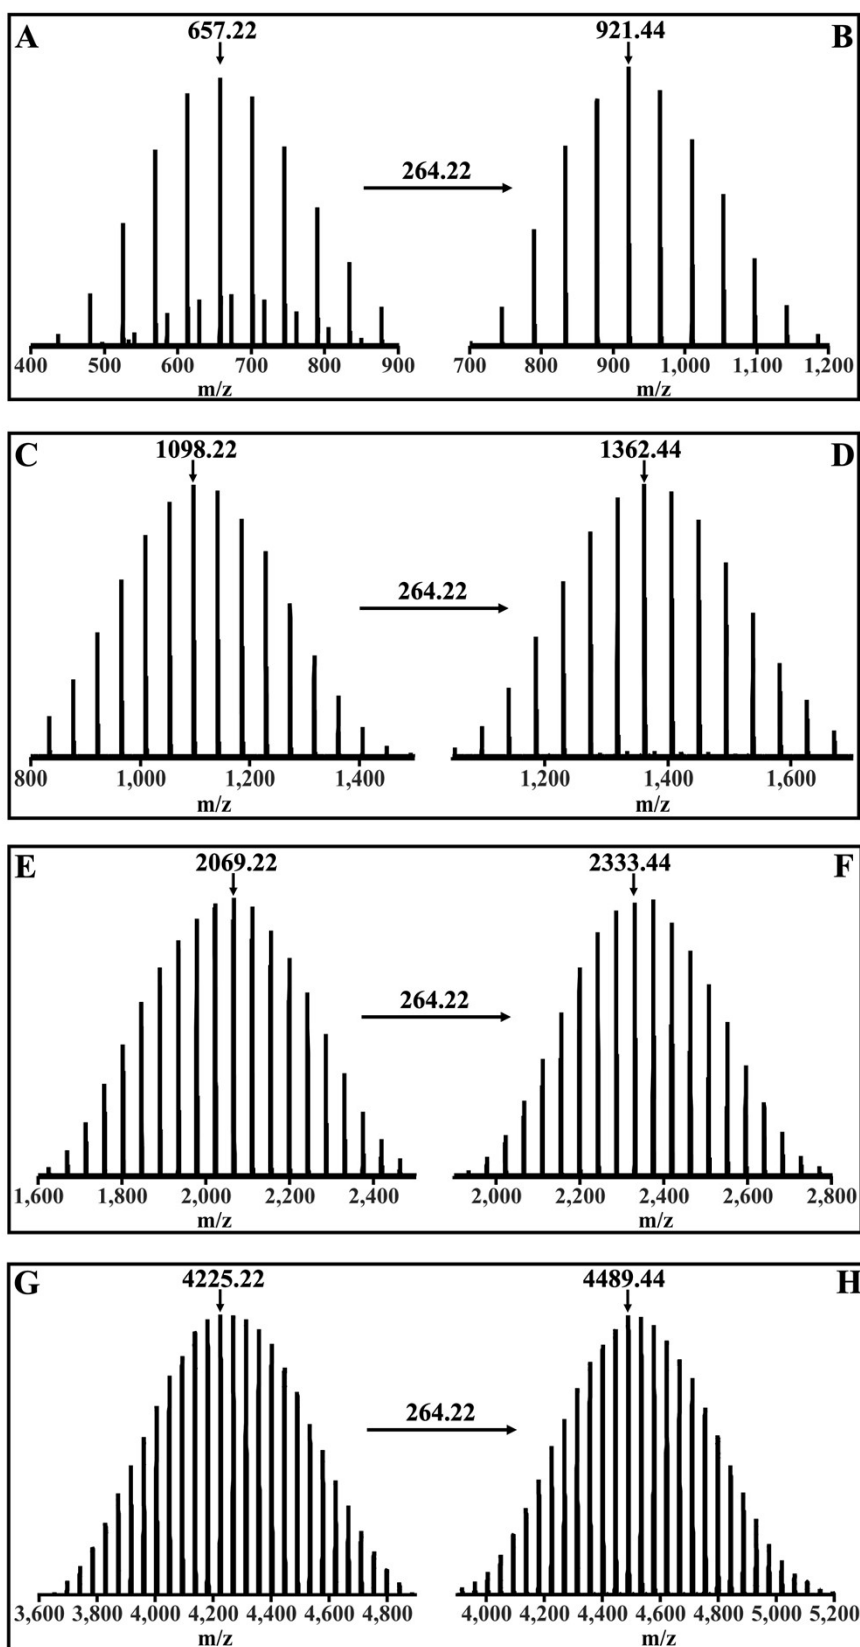

Figure S4. MALDI-TOF MS spectra of PEG600 (a), CHO-PEG600-CHO (b), PEG1000 (c), CHO-PEG1000-CHO (d), PEG2000 (e), CHO-PEG2000-CHO (f), PEG4000 (g), and CHO-PEG4000-CHO (h).

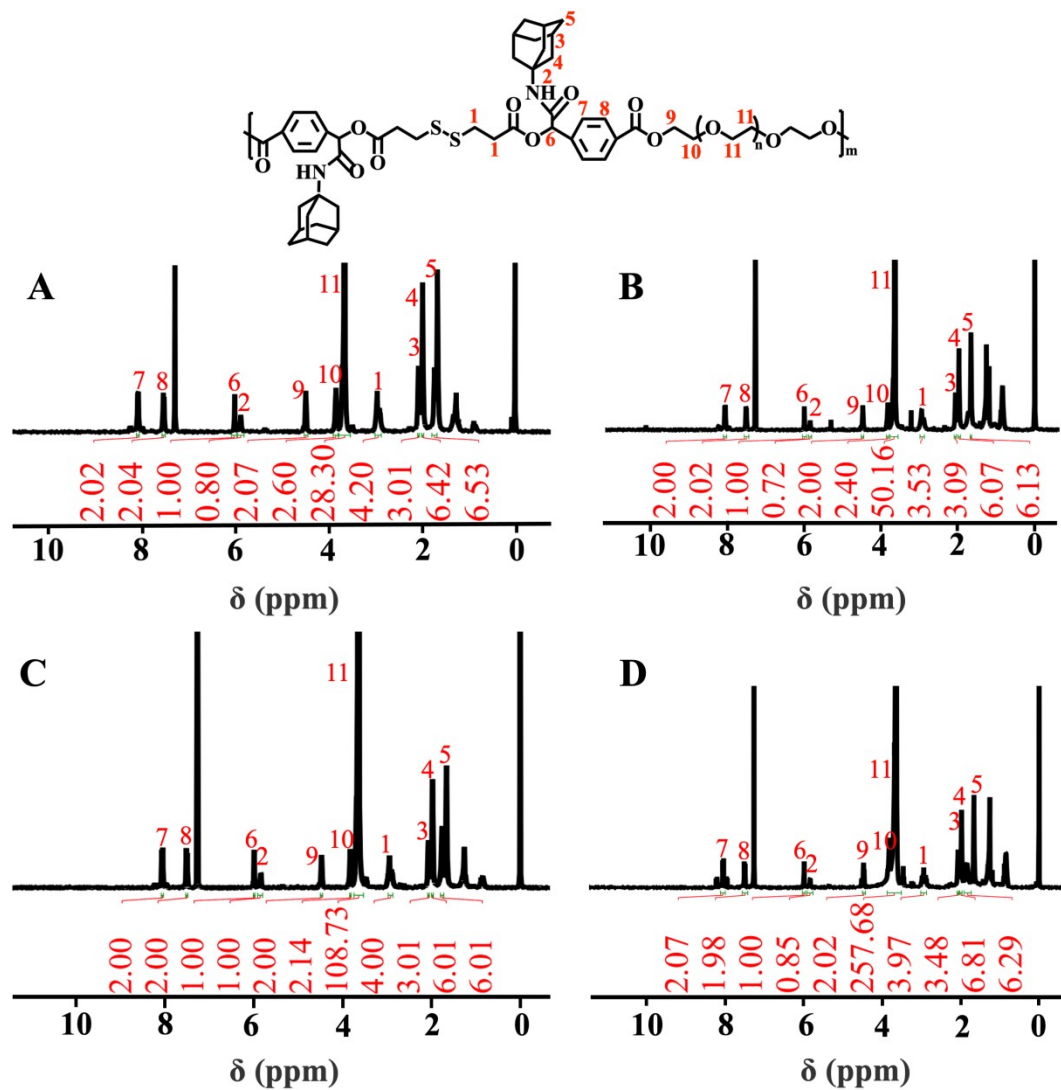

Figure S5. <sup>1</sup>H NMR spectra of P(PEG600) (a), P(PEG1000) (b), P(PEG2000) (c), and P(PEG4000) (d) in CDCl<sub>3</sub>.

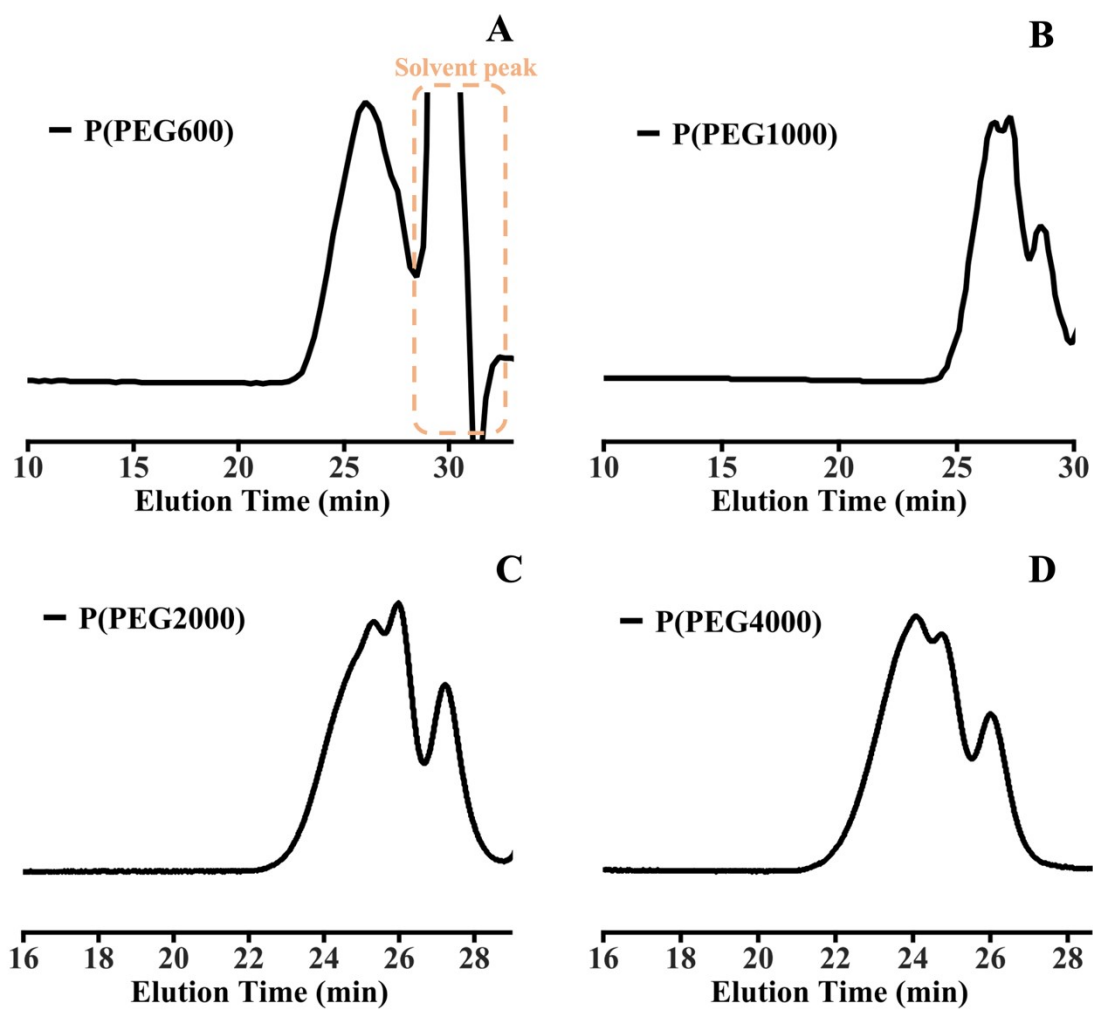

Figure S6. SEC curves of P(PEG600) (a), P(PEG1000) (b), P(PEG2000) (c), and P(PEG4000) (d).

Table S1.  $M_n$  and dispersity of P(PEG).

| P(PEG)     | $M_n$ (kDa) | Dispersity |
|------------|-------------|------------|
| P(PEG600)  | 12.8        | 1.42       |
| P(PEG1000) | 10.0        | 1.34       |
| P(PEG1500) | 11.0        | 1.58       |
| P(PEG2000) | 14.6        | 1.32       |
| P(PEG4000) | 25.5        | 1.34       |

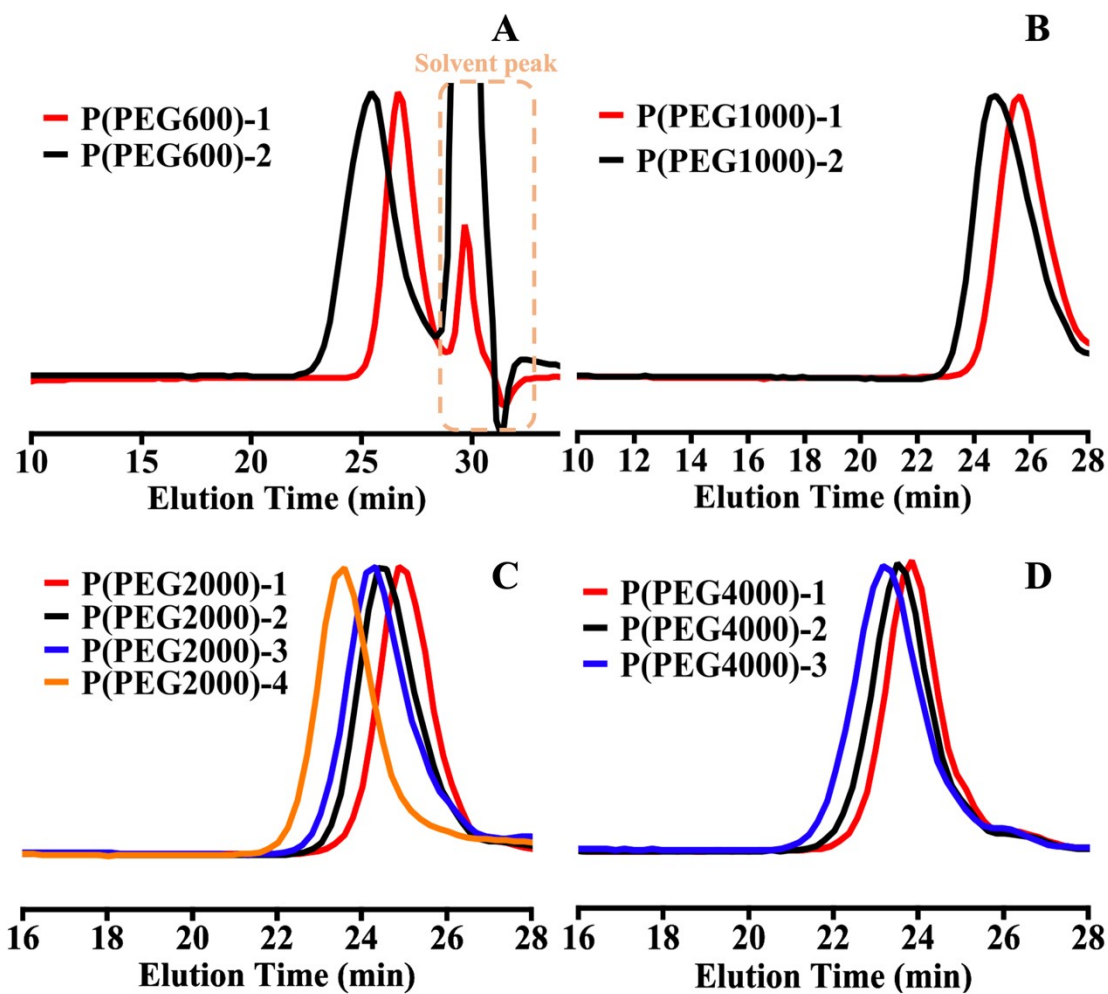

Figure S7. SEC curves of the fractions of P(PEG600) (a), P(PEG1000) (b), P(PEG2000) (c), and P(PEG4000) (d).

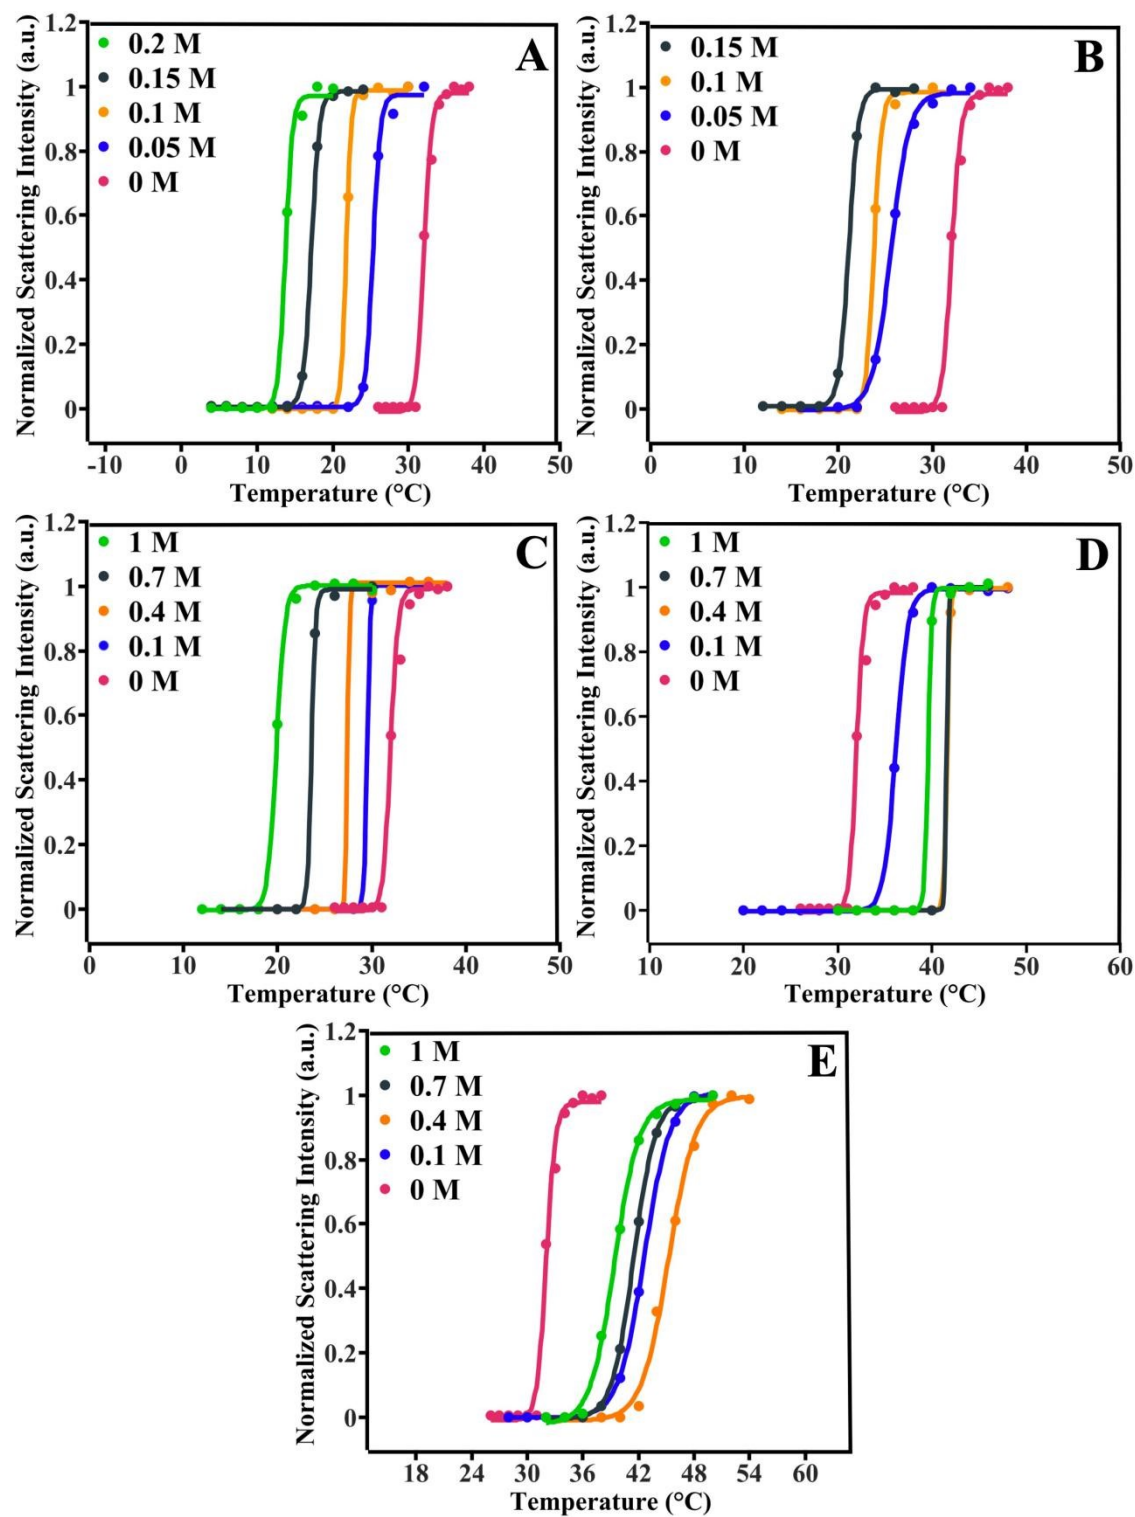

Figure S8. Temperature trends of the scattering intensities of P(PEG1500)-1 in Na<sub>2</sub>SO<sub>4</sub> (a), Na<sub>2</sub>CO<sub>3</sub> (b), NaCl (c), NaI (d), and NaSCN (e) solutions with different concentrations.



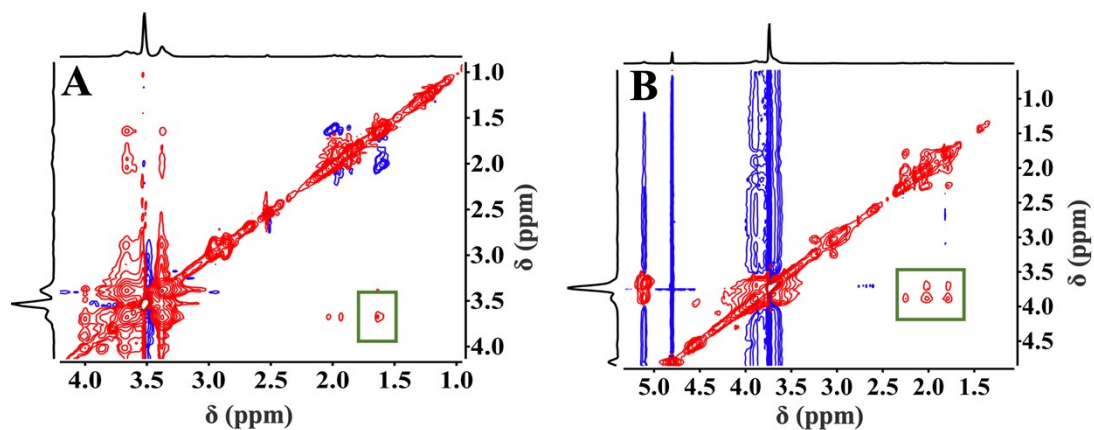

Figure S9. 2D <sup>1</sup>H NOESY NMR spectra of P(PEG1000)-1/CD-NH<sub>2</sub> in DMSO (a) and P(PEG2000)-1/CD-NH<sub>2</sub> in D<sub>2</sub>O (b).

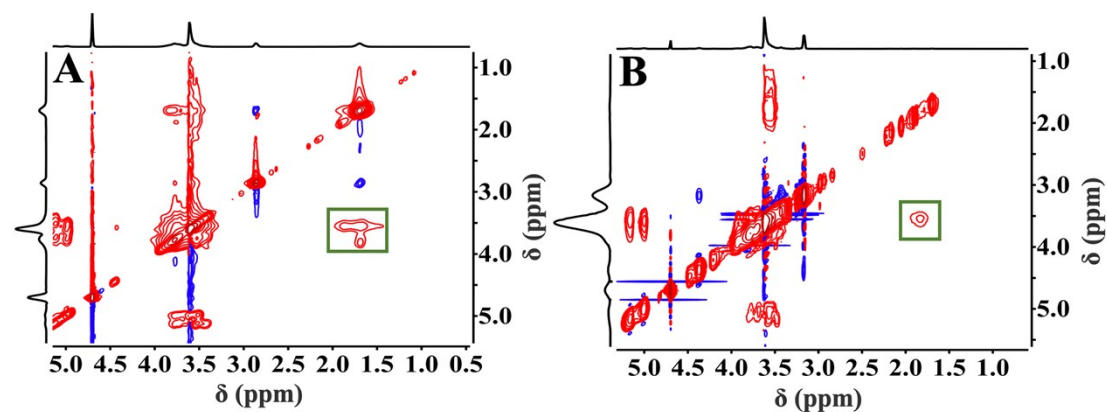

Figure S10. 2D <sup>1</sup>H NOESY NMR spectra of P(PEG2000)-3 recognized with SBE-CD (a) and HTMAP-CD (b) in D<sub>2</sub>O.

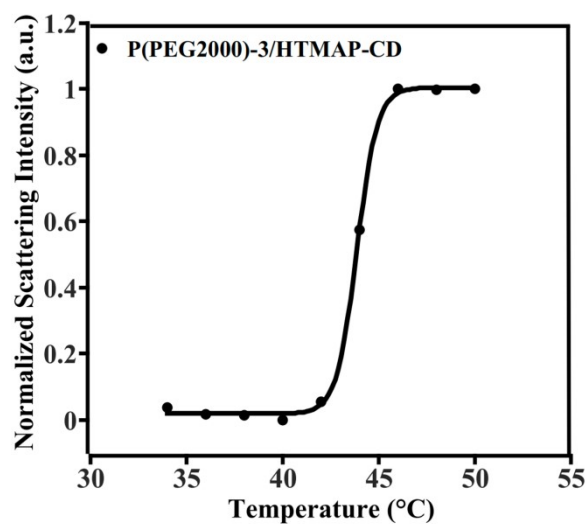

Figure S11. Temperature trend of the scattering intensities of the P(PEG2000)-3/HTMAP-CD in water.

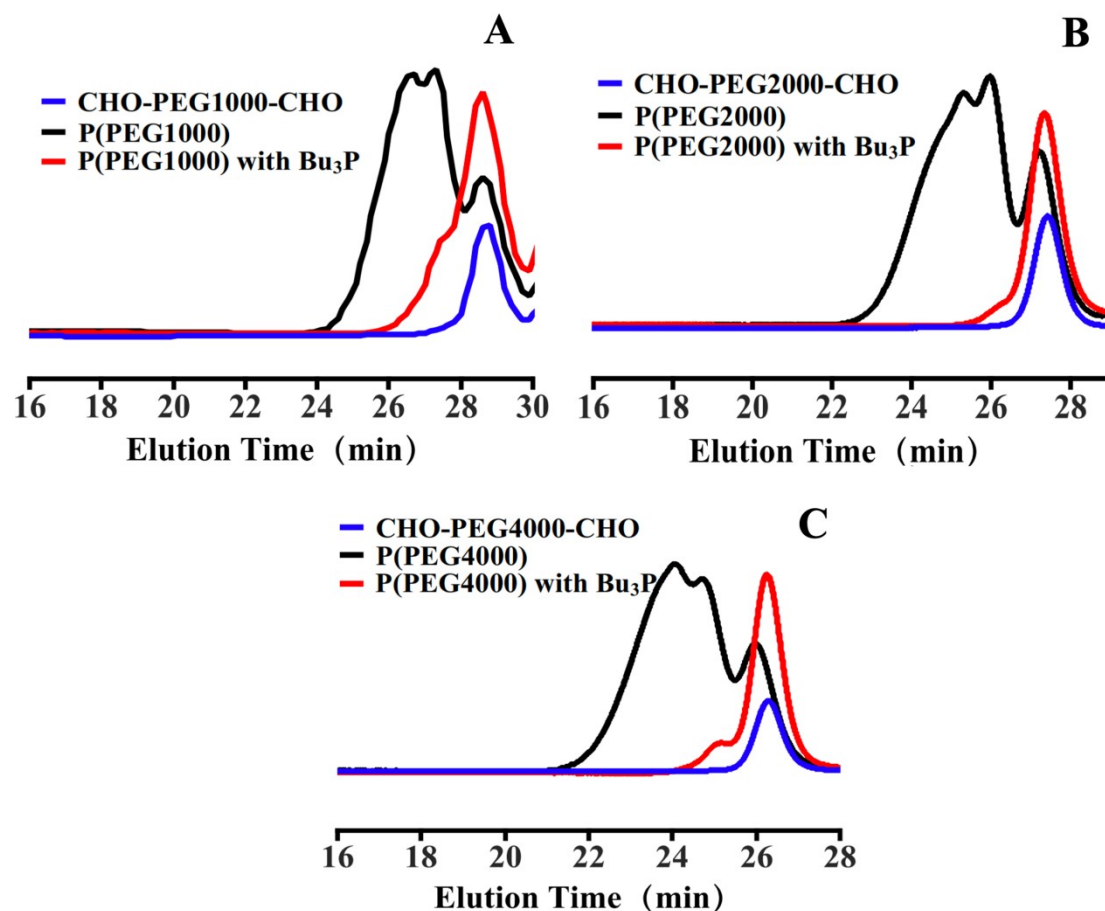

Figure S12. (a) SEC curves of CHO-PEG1000-CHO (blue line), P(PEG1000) (black line), and P(PEG1000) with  $\text{Bu}_3\text{P}$  (red line) (b) SEC curves of CHO-PEG2000-CHO (blue line), P(PEG2000) (black line), and P(PEG2000) with  $\text{Bu}_3\text{P}$  (red line) (c) SEC curves of CHO-PEG4000-CHO (blue line), P(PEG4000) (black line), and P(PEG4000) with  $\text{Bu}_3\text{P}$  (red line) in DMF.

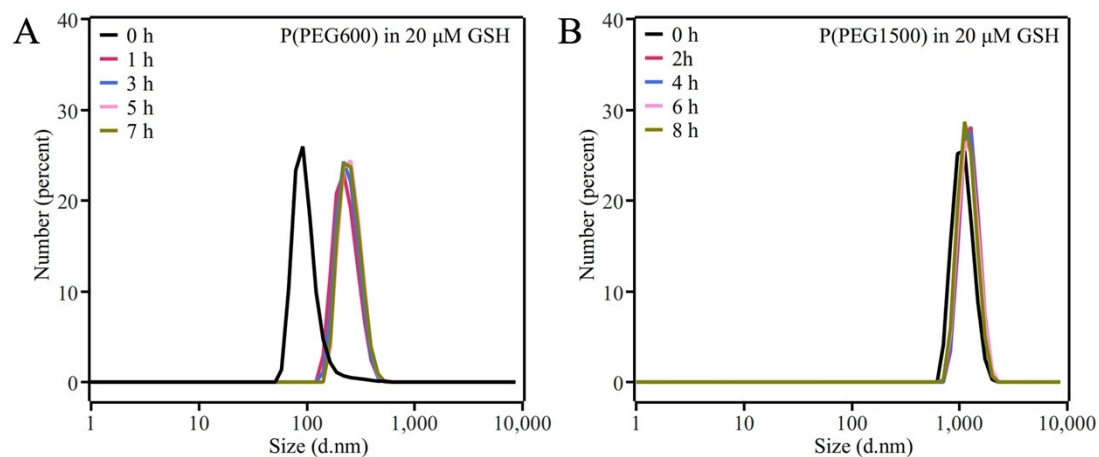

Figure S13. DLS results of P(PEG600)-1 (a) and P(PEG1500)-1 (b) degradation in 20  $\mu\text{M}$  GSH solution.
